# Supplementary material
Source: ML conference proceedings conference paper supplement (https://proceedings.mlr.press/v38/ren15.html)
Supplement: Supplementary file [file ren15-supp.pdf]

---

## Supplementary materials for the manuscript ‘‘A Scalable Algorithm for Structured Kernel Feature Selection’’

---

### 1 Convergence and Regret Analysis and Proof for Theorem 2

We provide the detailed proof for **Theorem 2** in **Section 3.2** in the manuscript. First, we re-state the theorem as follows:

**Theorem 2** With an auxiliary function  $h(\mathbf{a}) = \|\mathbf{a}\|^2$ , and the non-decreasing sequence  $\{\beta_t\}$  with  $\beta_t = \gamma(1 + \ln(t))$ , Let  $\{\mathbf{a}_t\}$  and  $\{\mathbf{g}_t\}$  be two sequences generated by **Algorithm 1** in the manuscript. Suppose the optimal solution  $\mathbf{a}^*$  to the original problem (1) in the manuscript satisfies  $h(\mathbf{a}^*) \leq D$ , for some  $D > 0$ , and there is a constant  $G$  such that  $\|\mathbf{g}_t\|_* \leq G$  for all  $t \geq 1$ , we have the following properties for **Algorithm 1**:

a) For each  $t \geq 1$ , the average regret is bounded by

$$R_t(\mathbf{a}) \leq \left( \gamma D^2 + \frac{G^2}{2\gamma} \right) (1 + \ln(t)).$$

b) The sequence of primal variables are bounded by

$$\|\mathbf{a}_{t+1} - \mathbf{a}^*\| \leq \frac{2}{\gamma(1+t+\ln(t))} \left( \left( \gamma D^2 + \frac{G^2}{2\gamma} \right) (1 + \ln(t)) - R_t(\mathbf{a}^*) \right).$$

Also we can have the convergence in the expectation form:

$$\mathbf{E}\|\mathbf{a}_{t+1} - \mathbf{a}^*\| \leq \frac{2}{1+t+\ln(t)} \left( D^2 + \frac{G^2}{2\gamma^2} \right) (1 + \ln(t)).$$

**Proof:** We use the indication function to represent the non-negative region constraint:

$$\Phi(\mathbf{a}) = I_C(\mathbf{a}) = \begin{cases} 0 & \text{if } a_i \geq 0, \forall i > 0 \\ \infty & \text{if } \exists a_i < 0, i > 0 \end{cases}$$

The loss function for our original problem can be written as:

$$f(\mathbf{a}) = \sum_{m=1}^n [n - \bar{L}_m^T(a_0 \mathbf{1} + \sum_{i=1}^p a_i \bar{K}_m^i)]_+ + \lambda_1 \sum_{i=1}^p a_i + \lambda_2 \sum_{(i,j) \in E} (a_i - a_j)^2$$

We define the region

$$\mathcal{F}_D = \{\mathbf{a} \in \text{dom}(\Phi) | h(\mathbf{a}) \leq D^2\}.$$

a) For the regret analysis, let

$$\delta_t = \max_{\mathbf{a} \in \mathcal{F}_D} \left\{ \sum_{\zeta=1}^t (\langle \mathbf{g}_\zeta, \mathbf{a}_\zeta - \mathbf{a} \rangle + \Phi(\mathbf{a}_\zeta)) - t\Phi(\mathbf{a}) \right\},$$

$t = 1, 2, 3, \dots$

We can see that  $\delta_t$  is the upper bound of the regret  $R_t(\mathbf{a})$

$$\begin{aligned} R_t(\mathbf{a}) &= \sum_{\zeta=1}^t (f_\zeta(\mathbf{a}_\zeta) + \Phi(\mathbf{a}_\zeta)) - \sum_{\zeta=1}^t (f_\zeta(\mathbf{a}) + \Phi(\mathbf{a})) \\ &= \sum_{\zeta=1}^t (f_\zeta(\mathbf{a}_\zeta) - f_\zeta(\mathbf{a}) + \Phi(\mathbf{a}_\zeta)) - t\Phi(\mathbf{a}) \\ &\leq \sum_{\zeta=1}^t (\langle \mathbf{g}_\zeta, \mathbf{a}_\zeta - \mathbf{a} \rangle + \Phi(\mathbf{a}_\zeta)) - t\Phi(\mathbf{a}) \\ &\leq \delta_t \end{aligned} \quad (1)$$

For an arbitrary initial feasible solution  $\mathbf{a}_0$ , we can rewrite

$$\begin{aligned} \delta_t &= \sum_{\zeta=1}^t (\langle \mathbf{g}_\zeta, \mathbf{a}_\zeta - \mathbf{a}_0 \rangle + \Phi(\mathbf{a}_\zeta)) \\ &\quad + \max_{\mathbf{a} \in \mathcal{F}_D} \{ \langle t\bar{\mathbf{g}}_t, \mathbf{a}_0 - \mathbf{a} \rangle - t\Phi(\mathbf{a}) \}. \end{aligned}$$

Define  $V_t(t\bar{\mathbf{g}}_t) = \max_{\mathbf{a}} \{ \langle t\bar{\mathbf{g}}_t, \mathbf{a} - \mathbf{a}_0 \rangle - t\Phi(\mathbf{a}) - \beta_t h(\mathbf{a}) \}$ . As  $\mathbf{a} \in \mathcal{F}_D$ , we can derive the following inequality similarly as in Lemma 9 in (Xiao, 2010):

$$\delta_t \leq \sum_{\zeta=1}^t (\langle \mathbf{g}_\zeta, \mathbf{a}_\zeta - \mathbf{a}_0 \rangle + \Phi(\mathbf{a}_\zeta)) + V_t(-t\bar{\mathbf{g}}_t) + \beta_t D^2. \quad (2)$$

According to Lemmas 10 and 11 in (Xiao, 2010), we can easily get

$$V_\zeta(-\zeta\bar{\mathbf{g}}_\zeta) + \Phi(\mathbf{a}_{\zeta+1}) \leq V_\zeta(-\zeta\bar{\mathbf{g}}_\zeta),$$

and

$$V_\zeta(-\zeta\bar{\mathbf{g}}_\zeta) \leq V_{\zeta-1}(-(\zeta-1)\bar{\mathbf{g}}_{\zeta-1}) + \langle -\mathbf{g}_\zeta, \mathbf{a}_\zeta - \mathbf{a}_0 \rangle + \frac{\|\mathbf{g}_\zeta\|_*^2}{2(\gamma(\zeta-1) + \beta_{\zeta-1})}$$

when  $\zeta \geq 2$ . Hence

$$V_\zeta(-\zeta\bar{\mathbf{g}}_\zeta) + \Phi(\mathbf{a}_{\zeta+1}) \leq V_{\zeta-1}(-(\zeta-1)\bar{\mathbf{g}}_{\zeta-1}) + \langle -\mathbf{g}_\zeta, \mathbf{a}_\zeta - \mathbf{a}_0 \rangle + \frac{\|\mathbf{g}_\zeta\|_*^2}{2(\gamma(\zeta-1) + \beta_{\zeta-1})}, \zeta \geq 2.$$

Moving corresponding terms, we get:

$$\langle \mathbf{g}_\zeta, \mathbf{a}_\zeta - \mathbf{a}_0 \rangle + \Phi(\mathbf{a}_{\zeta+1}) \leq V_{\zeta-1}(-(\zeta-1)\bar{\mathbf{g}}_{\zeta-1}) - V_\zeta(-\zeta\bar{\mathbf{g}}_\zeta) + \frac{\|\mathbf{g}_\zeta\|_*^2}{2(\gamma(\zeta-1) + \beta_{\zeta-1})}, \zeta \geq 2.$$

When  $\zeta = 1$ , we have

$$\langle \mathbf{g}_1, \mathbf{a}_1 - \mathbf{a}_0 \rangle + \Phi(\mathbf{a}_2) \leq -V_1(-\bar{\mathbf{g}}_1) + \frac{\|\mathbf{g}_1\|_*^2}{2(\beta_0)} + (\beta_0 - \beta_1)h(\mathbf{a}_2)$$

By adding all the inequalities for  $\zeta = 1, \dots, t$ , we can get

$$\begin{aligned} & \sum_{\zeta=1}^t (\langle \mathbf{g}_\zeta, \mathbf{a}_\zeta - \mathbf{a}_0 \rangle + \Phi(\mathbf{a}_{\zeta+1})) + V_\zeta(-\zeta\bar{\mathbf{g}}_\zeta) \\ & \leq (\beta_0 - \beta_1)h(\mathbf{a}_2) + \frac{1}{2} \sum_{\zeta=1}^t \frac{\|\mathbf{g}_\zeta\|_*^2}{\gamma(\zeta-1) + \beta_{\zeta-1}} \end{aligned}$$

Since  $\mathbf{a}_1 = \mathbf{a}_0 = \mathbf{0} \in \arg\min_{\mathbf{a}} \Phi(\mathbf{a})$ , so  $\Phi(\mathbf{a}_{t+1}) \geq \Phi(\mathbf{a}_0) = \Phi(\mathbf{a}_1)$ . Adding  $\Phi(\mathbf{a}_1) - \Phi(\mathbf{a}_{t+1})$  to both sides,

$$\sum_{\zeta=1}^t (\langle \mathbf{g}_\zeta, \mathbf{a}_\zeta - \mathbf{a}_0 \rangle + \Phi(\mathbf{a}_\zeta)) + V_\zeta(-\zeta\bar{\mathbf{g}}_\zeta) \quad (3)$$

$$\leq (\beta_0 - \beta_1)h(\mathbf{a}_2) + \frac{1}{2} \sum_{\zeta=1}^t \frac{\|\mathbf{g}_\zeta\|_*^2}{\gamma(\zeta-1) + \beta_{\zeta-1}} \quad (4)$$

Substituting this into (2), we have

$$R_t(\mathbf{a}) \leq \delta_t \leq \beta_t D^2 + \frac{1}{2} \sum_{\zeta=1}^t \frac{\|\mathbf{g}_\zeta\|_*^2}{\gamma(\zeta-1) + \beta_{\zeta-1}} + \frac{2(\beta_0 - \beta_1)\|\mathbf{g}_1\|_*^2}{\beta_1 + \gamma}.$$

For our algorithm  $\beta_t = \gamma(1 + \ln(t))$ , and  $\beta_0 = \beta_1 = \gamma$ , hence

$$\begin{aligned} R_t(\mathbf{a}) \leq \delta_t & \leq \gamma(1 + \ln(t))D^2 + \frac{G^2}{2\gamma} \left(1 + \sum_{\zeta=1}^{t-1} \frac{1}{\zeta + 1 + \ln \zeta}\right) \\ & \leq \left(\gamma D^2 + \frac{G^2}{2\gamma}\right)(1 + \ln(t)) \end{aligned}$$

b) To find the bounds for primal variables, we first rewrite the solution to the subproblem (9) in the manuscript at the  $t$ th step in **Algorithm 1**:

$$\mathbf{a}_{t+1} = \arg \min_{\mathbf{a}} \{ \langle t\bar{\mathbf{g}}_t, \mathbf{a} \rangle + t\Phi(\mathbf{a}) + \beta_t h(\mathbf{a}) \}.$$

The subgradients  $\mathbf{b}_{t+1} \in \partial\Phi(\mathbf{a}_{t+1})$  and  $\mathbf{d}_{t+1} \in \partial h(\mathbf{a}_{t+1})$  satisfy the following inequality:

$$\langle t\bar{\mathbf{g}}_t + t\mathbf{b}_{t+1} + \beta_t \mathbf{d}_{t+1}, \mathbf{a} - \mathbf{a}_{t+1} \rangle \geq 0, \forall \mathbf{a} \in \text{dom}(\Phi).$$

Since both  $\Phi(\cdot)$  and  $h(\cdot)$  are strongly convex, we have

$$\begin{aligned} & \frac{1}{2}(\gamma t + \beta_t)\|\mathbf{a}_{t+1} - \mathbf{a}\|^2 \\ & \leq t(\Phi(\mathbf{a}) - \Phi(\mathbf{a}_{t+1}) - \langle \mathbf{b}_{t+1}, \mathbf{a} - \mathbf{a}_{t+1} \rangle) + \\ & \quad \beta_t(h(\mathbf{a}) - h(\mathbf{a}_{t+1}) - \langle \mathbf{d}_{t+1}, \mathbf{a} - \mathbf{a}_{t+1} \rangle) \\ & = \beta_t h(\mathbf{a}) - \beta_t h(\mathbf{a}_{t+1}) - \langle t\mathbf{b}_{t+1} + \beta_t \mathbf{d}_{t+1}, \mathbf{a} - \mathbf{a}_{t+1} \rangle \\ & \quad + t\Phi(\mathbf{a}) - t\Phi(\mathbf{a}_{t+1}) \\ & \leq \beta_t h(\mathbf{a}) - \beta_t h(\mathbf{a}_{t+1}) + \langle t\bar{\mathbf{g}}_t, \mathbf{a} - \mathbf{a}_{t+1} \rangle + t\Phi(\mathbf{a}) \\ & \quad - t\Phi(\mathbf{a}_{t+1}) \\ & = \beta_t h(\mathbf{a}) + t\Phi(\mathbf{a}) + \{ \langle -t\bar{\mathbf{g}}_t, \mathbf{a}_{t+1} - \mathbf{a}_0 \rangle - \beta_t h(\mathbf{a}_{t+1}) \\ & \quad - t\Phi(\mathbf{a}_{t+1}) \} + \langle t\bar{\mathbf{g}}_t, \mathbf{a} - \mathbf{a}_0 \rangle \\ & = \beta_t h(\mathbf{a}) + t\Phi(\mathbf{a}) + V_t(-t\bar{\mathbf{g}}_t) + \langle t\bar{\mathbf{g}}_t, \mathbf{a} - \mathbf{a}_0 \rangle. \end{aligned}$$

Note that for the dual average methods in **Algorithm 1**,

$$\langle t\bar{\mathbf{g}}_t, \mathbf{a} - \mathbf{a}_0 \rangle = \sum_{\zeta=1}^t \langle \mathbf{g}_\zeta, \mathbf{a} - \mathbf{a}_\zeta \rangle + \sum_{\zeta=1}^t \langle \mathbf{g}_\zeta, \mathbf{a}_\zeta - \mathbf{a}_0 \rangle.$$

Substituting the corresponding term, we can get

$$\begin{aligned} & \frac{1}{2}(\gamma t + \beta_t)\|\mathbf{a}_{t+1} - \mathbf{a}\|^2 \\ & \leq \beta_t h(\mathbf{a}) + \left\{ V_t(-t\bar{\mathbf{g}}_t) + \sum_{\zeta=1}^t (\langle \mathbf{g}_\zeta, \mathbf{a} - \mathbf{a}_0 \rangle + \Phi(\mathbf{a}_\zeta)) \right\} \\ & \quad + \sum_{\zeta=1}^t \langle \mathbf{g}_\zeta, \mathbf{a} - \mathbf{a}_\zeta \rangle + t\Phi(\mathbf{a}) - \sum_{\zeta=1}^t \Phi(\mathbf{a}_\zeta). \end{aligned}$$

Taking the proof for a) (1) that

$$\begin{aligned} & \sum_{\zeta=1}^t \langle \mathbf{g}_\zeta, \mathbf{a} - \mathbf{a}_\zeta \rangle + t\Phi(\mathbf{a}) - \sum_{\zeta=1}^t \Phi(\mathbf{a}_\zeta) \\ & \leq \sum_{\zeta=1}^t (f_\zeta(\mathbf{a}) - f_\zeta(\mathbf{a}_\zeta)) + t\Phi(\mathbf{a}) - \sum_{\zeta=1}^t \Phi(\mathbf{a}_\zeta) \\ & = \sum_{\zeta=1}^t (f_\zeta(\mathbf{a}) + \Phi(\mathbf{a})) - \sum_{\zeta=1}^t (f_\zeta(\mathbf{a}_\zeta) + \Phi(\mathbf{a}_\zeta)) \\ & = -R_t(\mathbf{a}), \end{aligned}$$

Using (4), we can derive

$$\frac{1}{2}(\gamma t + \beta_t) \|\mathbf{a}_{t+1} - \mathbf{a}\|_2^2 \leq \beta_t h(\mathbf{a}) + (\beta_0 - \beta_1) h(\mathbf{a}_2) + \frac{1}{2} \sum_{\zeta=1}^t \frac{\|\mathbf{g}_\zeta\|_*^2}{\gamma(\zeta - 1) + \beta_{\zeta-1}} - R_t(\mathbf{a})$$

By the assumptions given in the theorem, and setting  $\beta_0 = \beta_1 = \gamma$ , we have

$$\begin{aligned} & \frac{1}{2}(\gamma t + \beta_t) \|\mathbf{a}_{t+1} - \mathbf{a}\|_2^2 \leq \\ & \gamma(1 + \ln(t)) D^2 + \frac{G^2}{2\gamma} \left( 1 + \sum_{\zeta=1}^{t-1} \frac{1}{\zeta + 1 + \ln \zeta} \right) - R_t(\mathbf{a}) \\ & \leq \left( \gamma D^2 + \frac{G^2}{2\gamma} \right) (1 + \ln(t)) - R_t(\mathbf{a}). \end{aligned}$$

Hence,

$$\begin{aligned} & \|\mathbf{a}_{t+1} - \mathbf{a}^*\| \leq \\ & \frac{2}{\gamma(1 + t + \ln(t))} \left( \left( \gamma D^2 + \frac{G^2}{2\gamma} \right) (1 + \ln(t)) - R_t(\mathbf{a}^*) \right). \end{aligned}$$

c) Let  $z_\zeta = \{Y_\zeta, X_\zeta\}$  be the  $\zeta$ th sample for **Algorithm 1**, and  $\mathbf{z}[t]$  denote the collection of i.i.d random variables  $\{z_1, \dots, z_t\}$ . We can take  $\mathbf{a}_\zeta$  as a function of  $\{z_1, \dots, z_{\zeta-1}\}$ , which is independent of  $\{z_\zeta, \dots, z_t\}$ .

We have

$$\begin{aligned} R_t(\mathbf{a}^*) &= \sum_{\zeta=1}^t (f(\mathbf{a}_\zeta, z_\zeta) + \Phi(\mathbf{a}_\zeta)) - \\ & \sum_{\zeta=1}^t (f(\mathbf{a}_\zeta^*, z_\zeta) + \Phi(\mathbf{a}_\zeta^*)), \end{aligned}$$

and

$$\begin{aligned} \mathbf{E}_{\mathbf{z}[t]} (f(\mathbf{a}_\zeta, z_\zeta) + \Phi(\mathbf{a}_\zeta)) &= \mathbf{E}_{\mathbf{z}[\zeta-1]} (f(\mathbf{a}_\zeta, z_\zeta) + \Phi(\mathbf{a}_\zeta)) \\ &= \mathbf{E}_{\mathbf{z}[t]} (f(\mathbf{a}_\zeta) + \Phi(\mathbf{a}_\zeta)). \end{aligned}$$

We also can get

$$\begin{aligned} \mathbf{E}_{\mathbf{z}[t]} (f(\mathbf{a}^*, z_\zeta) + \Phi(\mathbf{a}^*)) &= \mathbf{E}_{z_\zeta} (f(\mathbf{a}^*, z_\zeta) + \Phi(\mathbf{a}^*)) \\ &= f(\mathbf{a}^*) + \Phi(\mathbf{a}^*). \end{aligned}$$

Since

$$f(\mathbf{a}^*) + \Phi(\mathbf{a}^*) = \min_{\mathbf{a}} f(\mathbf{a}) + \Phi(\mathbf{a}),$$

combining the previous results leads to the following equation:

$$\begin{aligned} \mathbf{E}_{\mathbf{z}[t]} R_t(\mathbf{a}^*) &= \sum_{\zeta=1}^t \mathbf{E}_{\mathbf{z}[t]} (f(\mathbf{a}_\zeta) + \Phi(\mathbf{a}_\zeta)) - t(f(\mathbf{a}^*) + \Phi(\mathbf{a}^*)) \\ &\geq 0. \end{aligned}$$

Therefore, with the result from b), we can get

$$\mathbf{E} \|\mathbf{a}_{t+1} - \mathbf{a}^*\| \leq \frac{2}{1 + t + \ln(t)} \left( D^2 + \frac{G^2}{2\gamma^2} \right) (1 + \ln(t)).$$

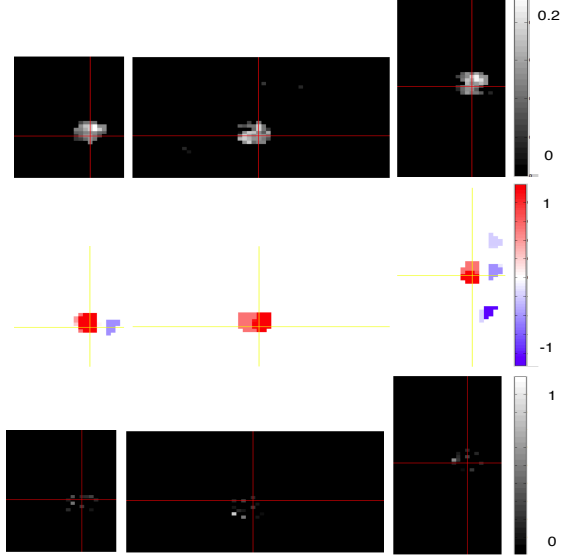

Figure 1: Active Regions recovered by the proposed method, Fused LASSO and HSIC-LASSO for simulated MRI images with additive nonlinear responses.

## 2 Some Figures for Simulation Results

Figures 1 and 2 illustrate the results for additive nonlinear and non-additive nonlinear simulations in **Sections 4.1.2** and **4.1.3** in the manuscript.

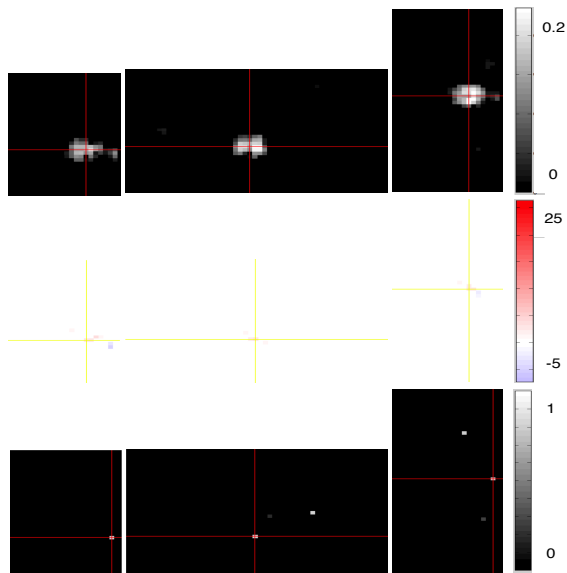

Figure 2: Active Regions recovered by the proposed method, Fused LASSO and HSIC-LASSO for simulated MRI images with non-additive nonlinear responses.
